# Supplementary material for: N-doped ZnO–MoS2 binary heterojunctions: the dual role of 2D MoS2 in the enhancement of photostability and photocatalytic activity under visible light irradiation for tetracycline degradation
Source: Royal Society of Chemistry journal article supplement (doi:10.1039/c6qm00274a), 2016-12-19
Supplement: c6qm00274a1.pdf [file c6qm00274a1.pdf]

## N-doped ZnO-MoS<sub>2</sub> binary heterojunctions: Dual role of 2D MoS<sub>2</sub> in the enhancement of photostability and photocatalytic activity under visible light irradiation for tetracycline degradation

Suneel Kumar,<sup>a</sup> Vipul Sharma,<sup>a</sup> Kaustava Bhattacharyya<sup>b</sup> and Venkata Krishnan<sup>a\*</sup>

<sup>a</sup>*School of Basic Sciences and Advanced Materials Research Center, Indian Institute of Technology Mandi, Kamand, Mandi 175005, Himachal Pradesh, India.*

<sup>b</sup>*Chemistry Division, Bhabha Atomic Research Centre, Mumbai 400085, Maharashtra, India.*

Email: [vkn@iitmandi.ac.in](mailto:vkn@iitmandi.ac.in)

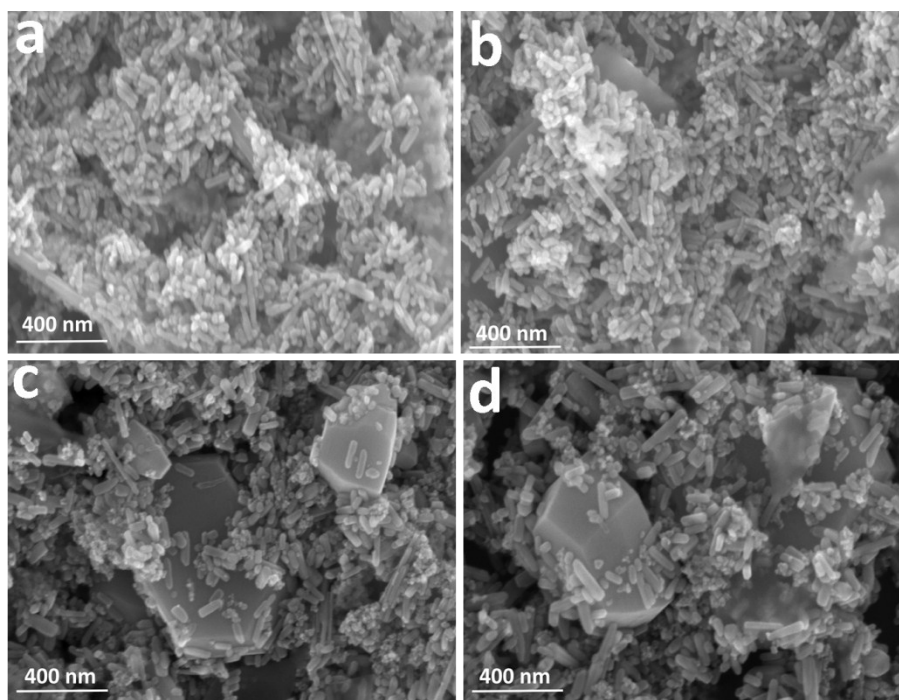

**Figure S1.** SEM images of (a) NZMO.2, (b) NZMO.5, (c) NZM2 and (d) NZM3 nanocomposites.

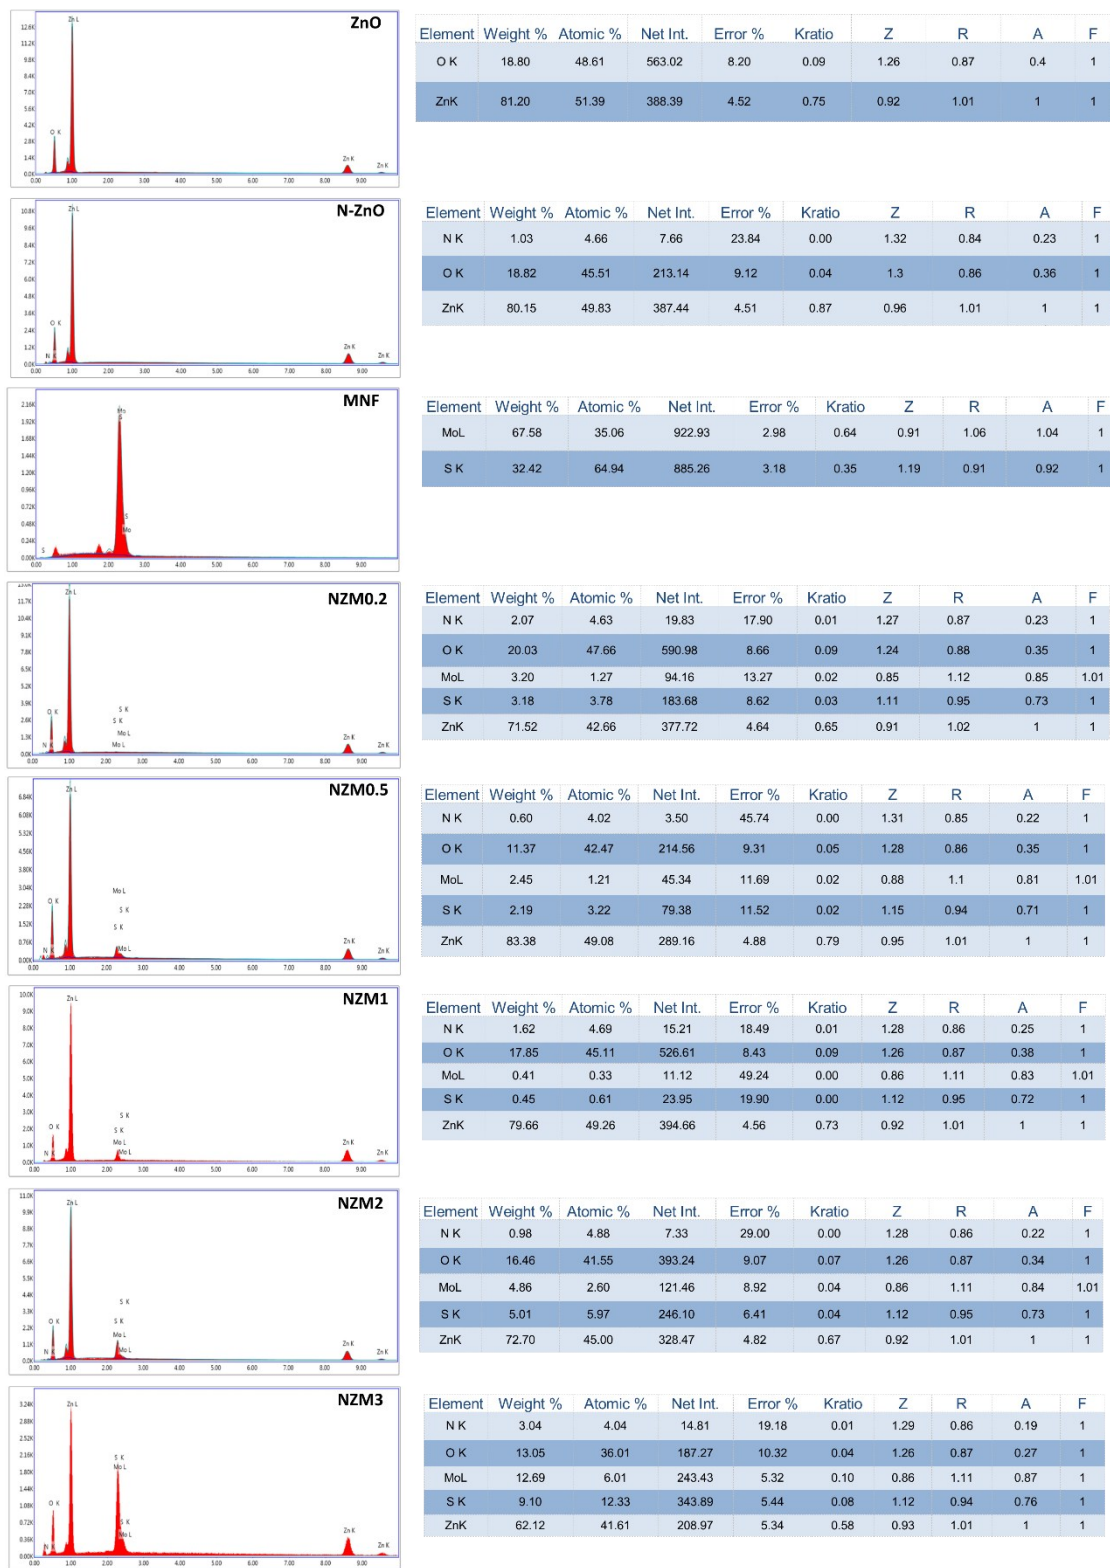

**Figure S2.** EDAX patterns and atomic percentage of ZnO, N-ZnO, MNF, NZM0.2, NZM0.5, NZM1, NZM2 and NZM3 heterojunctions.

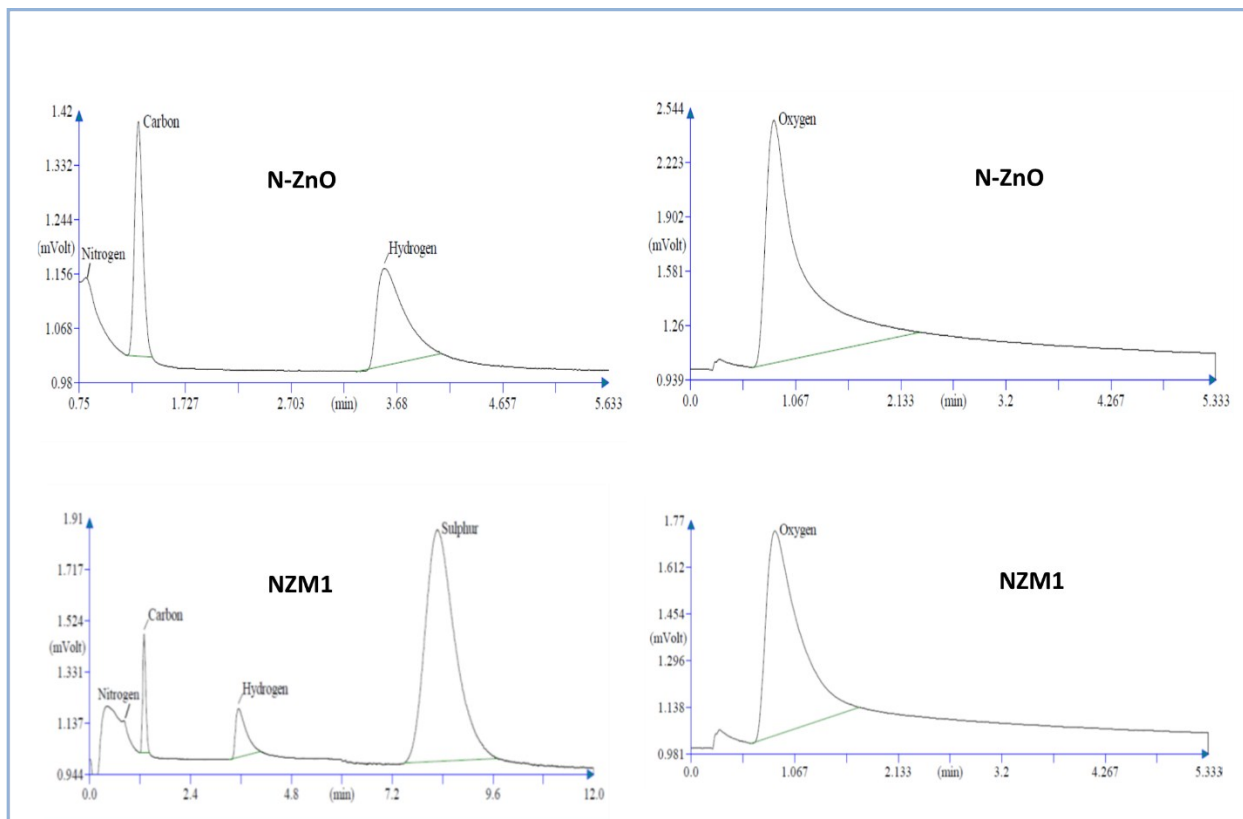

**Figure S3.** CHNSO analysis of N-ZnO and NZM1 heterojunction (representative sample) showing the presence of N, S and O.

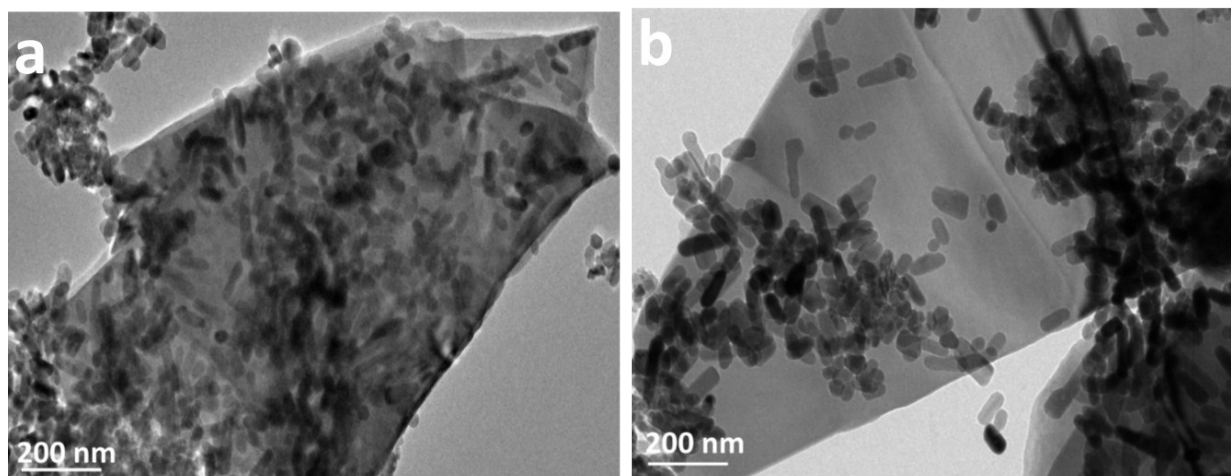

**Figure S4.** TEM images of (a) NZM2 and (b) NZM3 nanocomposites.
